# Supplementary material
Source: publisher figshare collection journal article supplement (https://gsajournals.figshare.com/ndownloader/files/17033480)
Supplement: Supplementary file 1 [file 17033480]

## Sheet: Statistics
Precursor	Peptide	Observed mass (Da)	First reproductive year						Third reproductive year
			Mean abundance	Mean SE-value	Sex	VGI	Sex*VGI	R2 (%)	Mean abundance	Mean SE	Sex	VGI	Sex*VGI	R2 (%)
Allatotropin	kr-GFRANSADRVAHGY-gkr	1518.86	6.66318	1.75084	NS	NS	NS	17.5	-	-	-	-	-	-
APGW-amide	kr-TLDILEDYT-kr	1081.5	11.6787	3.34937	NS	.	NS	49.2	12.0677	0.6296	.	*	*	62.9
Bucallin	kr-AMDKFGFASQL-gkr	1212.58	11.1343	2.88988	NS	NS	NS	39.7	13.6254	1.0344	*	NS	NS	53
Bucallin	kr-GVDPMAFRGSI-gkr	1147.56	10.2675	2.62322	NS	NS	NS	39.4	12.6347	3.048	NS	NS	NS	36.1
Bucallin	kr-RFDPILFGGRL-gkr	1288.74	9.42185	2.40431	NS	NS	NS	24.9	12.4822	0.5354	*	NS	NS	58
Bucallin	kr-RMDNLGFAGQL-gkr	1219.6	1.17906	3.43156	NS	NS	NS	25	12.6616	3.0359	NS	NS	NS	36.5
Cerebrin	kr-NGGTLDSLFNLPDLSDN-gr	1789.87	7.88133	5.1799	NS	*	.	58.5	-	-	-	-	-	-
Enterin-1	kr-LVNPFVYYALGKNKNSGNTP-eos	2195.17	13.5854	3.48487	NS	NS	NS	33	14.9739	1.1722	NS	*	.	62.6
Enterin-1	kr-MPTAFQTRLSPKVGRWFV-gkr	2119.16	11.2199	3.64112	NS	NS	NS	39.4	-	-	-	-	-	-
LFRFamide	kr-NFHWGRETEE-end of seq	1303.55	7.58906	4.19777	NS	NS	NS	42.9	14.1784	3.4883	NS	NS	NS	35
NKY	kr-NSPREINLDNSPIT-rkr	1568.79	9.14407	2.35091	NS	NS	NS	24.4	13.8326	3.2282	NS	NS	NS	40.8
Pedal peptide a-1	kk-GLDSISHFSDMDDF-gkr	1583.66	7.2412	3.44206	NS	NS	NS	29.5	10.3644	2.614	.	*	*	67
Pedal peptide a-1	kr-PFDSIAAGSDLSGFA-kr	1453.69	6.77502	4.00377	NS	.	NS	49.7	10.6249	2.3563	NS	NS	.	50.9
Pedal peptide a-1	kr-PFDSIAAGSGISGFA-kr	1395.67	-	-	-	-	-	-	10.6249	2.3563	NS	NS	.	50.9
Pedal peptide a-1	kr-PFDSIASGGGMAGFA-kr	1383.62	9.20837	4.42256	.	*	.	64.8	9.8094	2.5138	*	*	*	66.7
Pedal peptide a-1	kr-PFDSIASGRGMSGFA-kr	1498.69	-	-	-	-	-	-	12.8118	2.9972	NS	NS	NS	40.1
Pedal peptide a-1	kr-PFDSISAGRGMSGFV-kk	1526.72	10.4978	2.89616	NS	NS	NS	34.6	12.3028	2.8257	NS	NS	NS	46.2
Pedal peptide a-1a	kr-PFDSISGSSAFSDFA-kr	1533.68	9.2549	3.6207	NS	NS	NS	42.5	10.4728	0.9528	-	NS	-	22
Pedal peptide a-1	kr-PFDSISQGAGMAGFA-kr	1454.65	-	-	-	-	-	-	12.246	2.6898	NS	NS	.	52.3
Pedal peptide a-1	kr-PFDSISSGGGMAGFA-kr	1399.61	9.89117	2.79428	NS	NS	NS	36.2	11.7935	2.464	NS	.	*	60.4
Pedal peptide a-1	kr-PLDSISAGSGLSGFA-kr	1377.69	-	-	-	-	-	-	10.791	2.699	*	*	*	67.8
Pedal peptide a-1	kr-SFDSINAGSGLSGFA-kr	1428.66	10.2364	2.90574	NS	NS	NS	45	10.8301	2.5032	NS	NS	NS	44.8
Pedal peptide a-1	kr-SFDSINKGSGLSGFM-kr	1545.72	10.1003	2.88287	NS	NS	NS	35.9	11.8067	2.6989	NS	NS	NS	44
Pedal peptide a-1	kr-SVDNAVESESDE-kr	1279.67	-	-	-	-	-	-	10.0728	2.3931	NS	NS	NS	37.7
Pedal peptide a-3	kr-APFDPLANELIE-kr	1327.65	9.78383	2.62377	NS	NS	NS	34.1	9.1655	2.824	NS	*	*	73
Pedal peptide a-3	kr-AYTPYRLFRYHTF-kr	1733.87	10.1461	2.73074	NS	.	NS	48.4	-	-	-	-	-	-
Pedal peptide a-3	kr-FDPLASGLI-gkr	930.494	10.8158	2.89584	NS	NS	NS	33.9	11.7715	0.6467	.	.	NS	51.9
Pedal peptide a-3	kr-PFDPLASGLI-gkr	1027.55	9.97953	2.8962	NS	NS	NS	33.2	13.5875	0.9802	.	*	.	60.5
Pedal peptide a-3	kr-PFDRLASGLI-gkr	1086.62	10.0069	2.56117	NS	NS	NS	30.7	15.1552	1.2826	.	NS	NS	46.8
PKYMDT	sp-LPADEGRLDEASLAAE-kr	1655.79	11.5888	2.90926	NS	NS	NS	25	14.2643	3.2841	NS	NS	NS	41.5
sCAPa	gr-SGYLAFPRM-gr	1039.52	12.42	3.15838	NS	NS	NS	32.8	15.1552	1.2826	NS	NS	NS	42.3
sCAPb	sp-MNYLAFPRM-gr	1140.54	12.7627	3.23717	NS	NS	NS	32.3	15.3925	0.5227	*	NS	NS	55.1
ELH	ede-IQALDGDGEGHV-kr	1209.7	-	-	-	-	-	-	-	-	-	-	-	-
WW-amide	edps-LVEGVKPVSEAGQ-rslq	1311.89	-	-	-	-	-	-	-	-	-	-	-	-
SE – standard error; VGI – visual gonad index; NS-non-significant; P<0.1; * P<0.05; ** P<0.01; *** P<0.001; - not detected; a – detected in males only; eos – end of sequence; sp – signal peptide
